# Supplementary material for: Comparison of the Effects between Tannins Extracted from Different Natural Plants on Growth Performance, Antioxidant Capacity, Immunity, and Intestinal Flora of Broiler Chickens
Source: MDPI journal article supplement (doi:10.3390/antiox12020441), 2023-02-10
Supplement: s1 [file s1]

## Supplementary

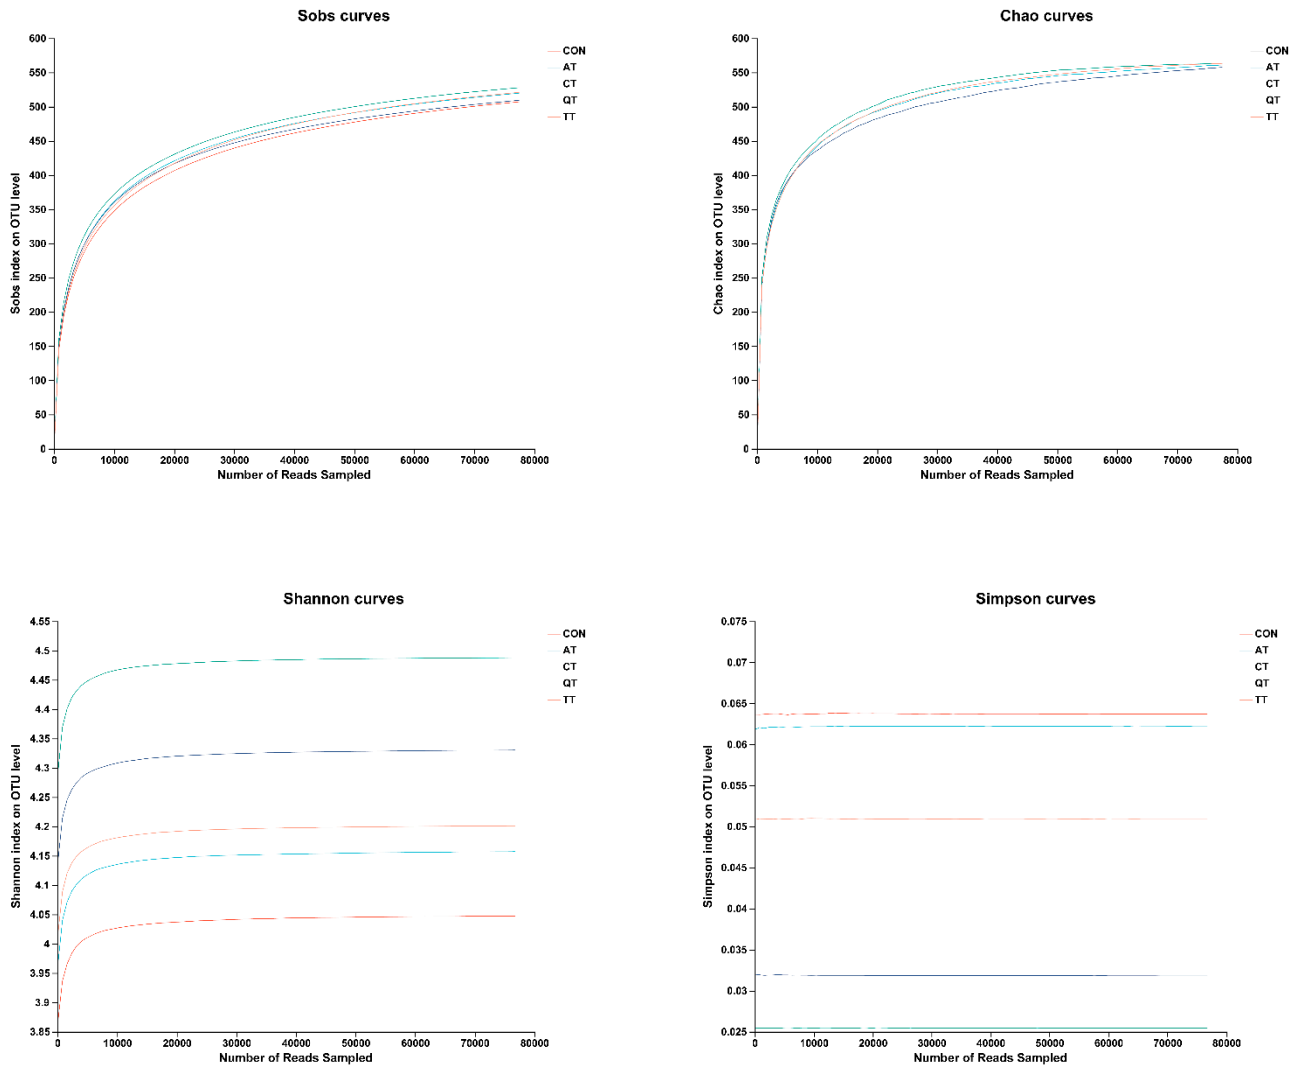

**Figure S1.** Alpha-diversity index curves of microbiota in different groups. (A)Sobs index, (B)Chao index, (C)Shannon index, (D)Simpson index. CON, control; AT, *Acacia mearnsii* tannin; CT, *Castanea sativa* tannin; QT, *Schinopsis lorenzii* tannin; TT, *Caesalpinia spinosa* tannin.

**Table S1.** Effects of adding different tannins to the diet on diversity indices (mean + SD).

| Parameters | CON                         | AT                           | CT                          | QT                           | TT                           |
|------------|-----------------------------|------------------------------|-----------------------------|------------------------------|------------------------------|
| Sobs       | 506.83 ± 10.72 <sup>b</sup> | 520.83 ± 20.28 <sup>ab</sup> | 524.50 ± 16.81 <sup>a</sup> | 508.17 ± 27.46 <sup>ab</sup> | 517.50 ± 22.33 <sup>ab</sup> |
| Chao       | 549.24 ± 24.29              | 561.38 ± 30.27               | 563.47 ± 15.87              | 556.79 ± 31.76               | 563.48 ± 41.65               |
| Shannon    | 4.05 ± 0.31 <sup>b</sup>    | 4.16 ± 0.45 <sup>ab</sup>    | 4.48 ± 0.17 <sup>a</sup>    | 4.33 ± 0.23 <sup>ab</sup>    | 4.20 ± 0.31 <sup>ab</sup>    |
| Simpson    | 0.064 ± 0.044 <sup>a</sup>  | 0.062 ± 0.061 <sup>ab</sup>  | 0.026 ± 0.009 <sup>b</sup>  | 0.032 ± 0.011 <sup>ab</sup>  | 0.051 ± 0.028 <sup>ab</sup>  |

Values in the same row with different small letter (a, b) superscripts indicate significant differences ( $p < 0.05$ ). CON, control; AT, *Acacia mearnsii* tannin; CT, *Castanea sativa* tannin; QT, *Schinopsis lorenzii* tannin; TT, *Caesalpinia spinosa* tannin.

**Table S2.** Proportion of various bacterial communities at the phylum level (%).

| Community type | CON                        | AT                        | CT                         | QT                        | TT                         |
|----------------|----------------------------|---------------------------|----------------------------|---------------------------|----------------------------|
| Firmicutes     | 92.29 ± 1.36 <sup>ab</sup> | 94.20 ± 1.15 <sup>a</sup> | 91.37 ± 1.48 <sup>ab</sup> | 85.14 ± 4.05 <sup>b</sup> | 88.26 ± 3.73 <sup>ab</sup> |

|                  |                         |                        |                         |                         |                         |
|------------------|-------------------------|------------------------|-------------------------|-------------------------|-------------------------|
| Bacteroidota     | 6.37±1.37 <sup>ab</sup> | 4.57±1.05 <sup>b</sup> | 7.07±1.36 <sup>ab</sup> | 13.80±4.04 <sup>a</sup> | 8.74±1.18 <sup>ab</sup> |
| Actinobacteriota | 0.95±0.05 <sup>ab</sup> | 0.77±0.09 <sup>b</sup> | 0.91±0.15 <sup>ab</sup> | 0.71±0.10 <sup>b</sup>  | 0.99±0.20 <sup>ab</sup> |
| Others           | 0.39±0.08               | 0.46±0.13              | 0.65±0.28               | 0.35±0.04               | 0.54±0.16               |

Values in the same row with different small letter (a, b) superscripts indicate significant differences ( $p < 0.05$ ). CON, control; AT, *Acacia mearnsii* tannin; CT, *Castanea sativa* tannin; QT, *Schinopsis lorenzii* tannin; TT, *Caesalpinia spinosa* tannin.

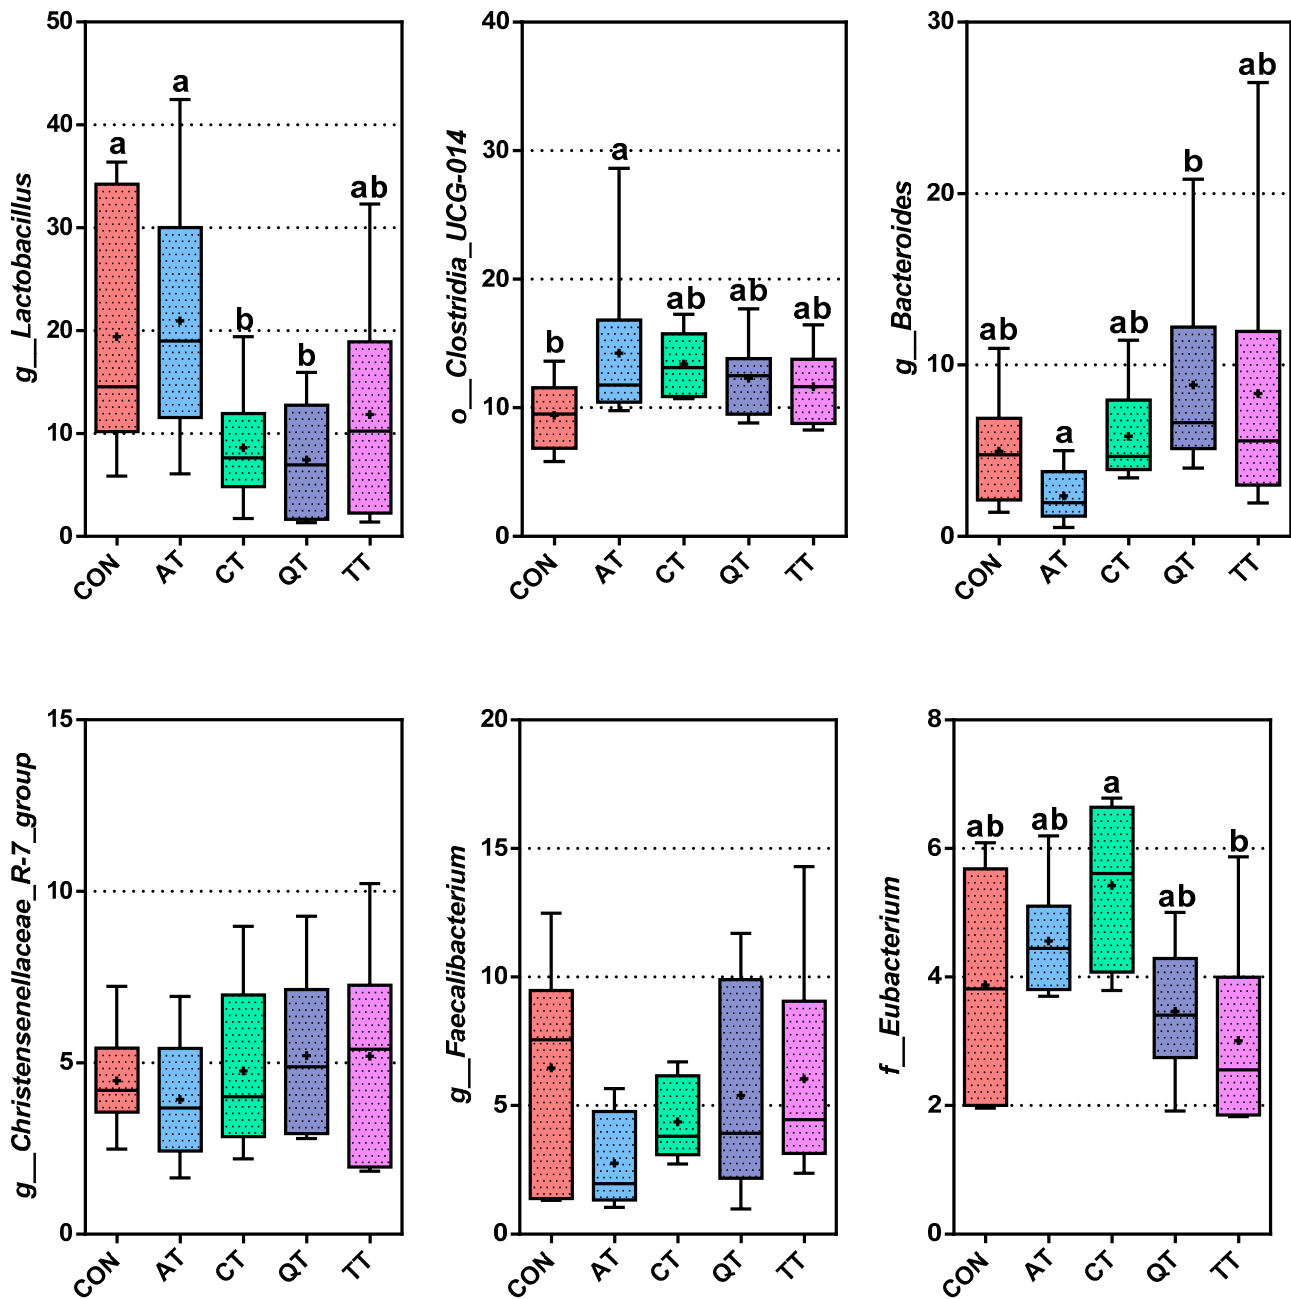

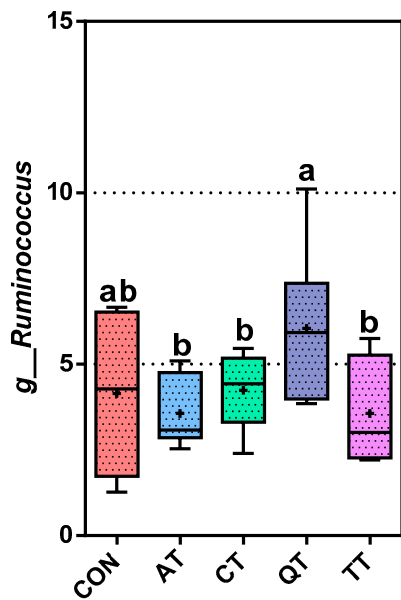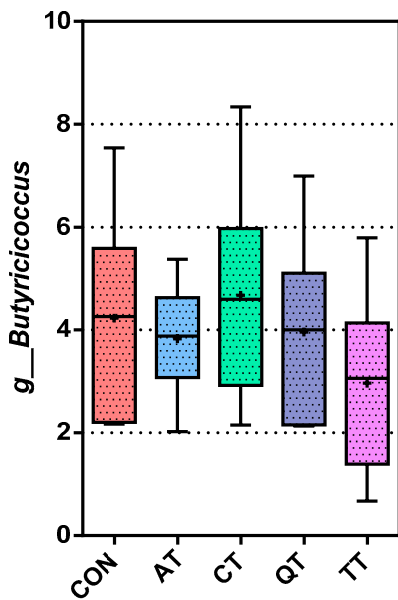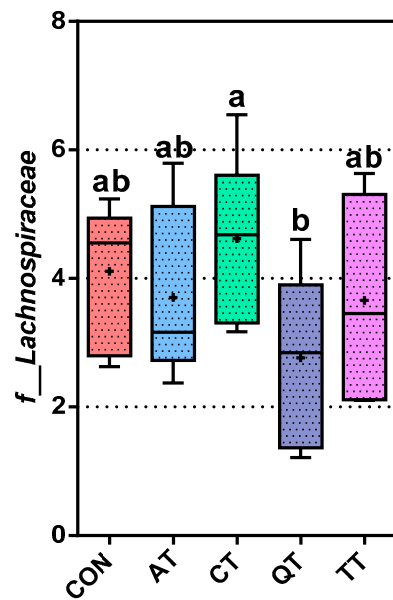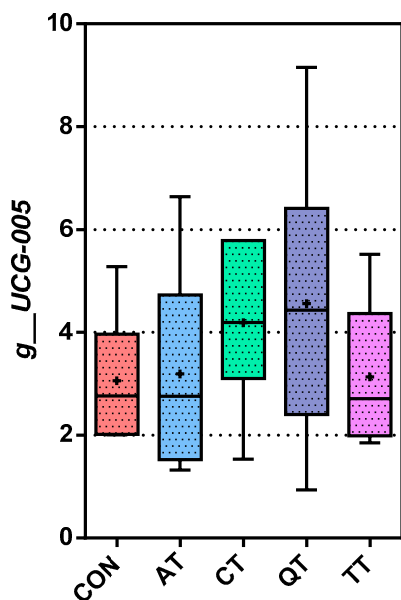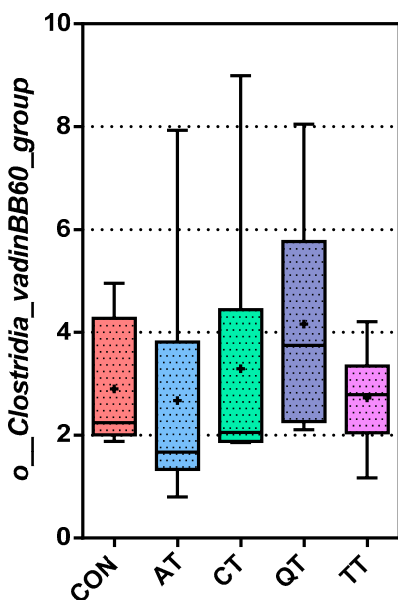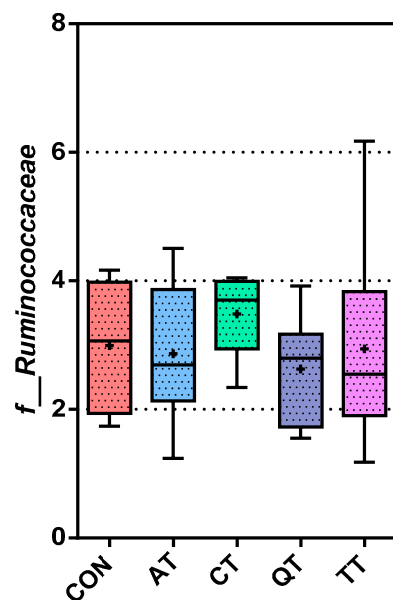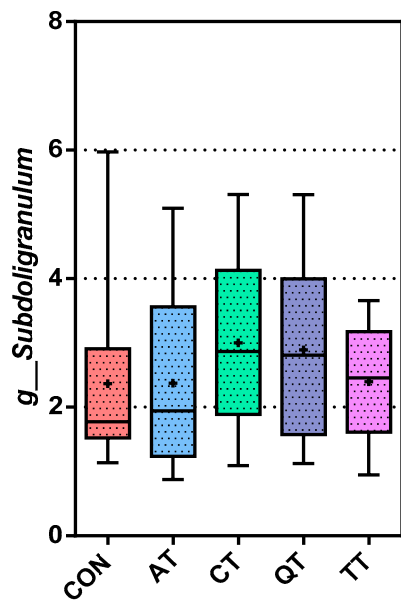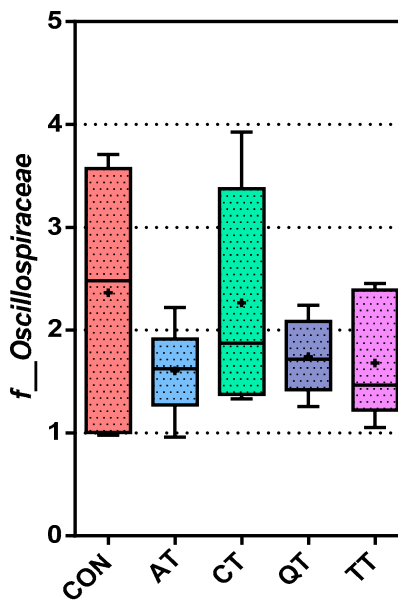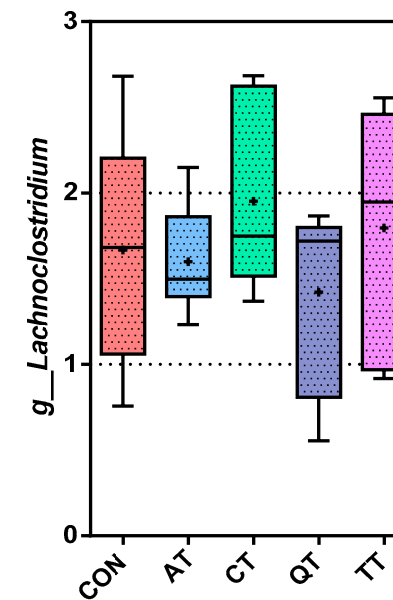

**Figure S2.** The abundance of the top 15 species at the genus level. Different small letter (a, b) superscripts indicate significant differences ( $p < 0.05$ ). CON, control; AT, *Acacia mearnsii* tannin; CT, *Castanea sativa* tannin; QT, *Schinopsis lorenzii* tannin; TT, *Caesalpinia spinosa* tannin.

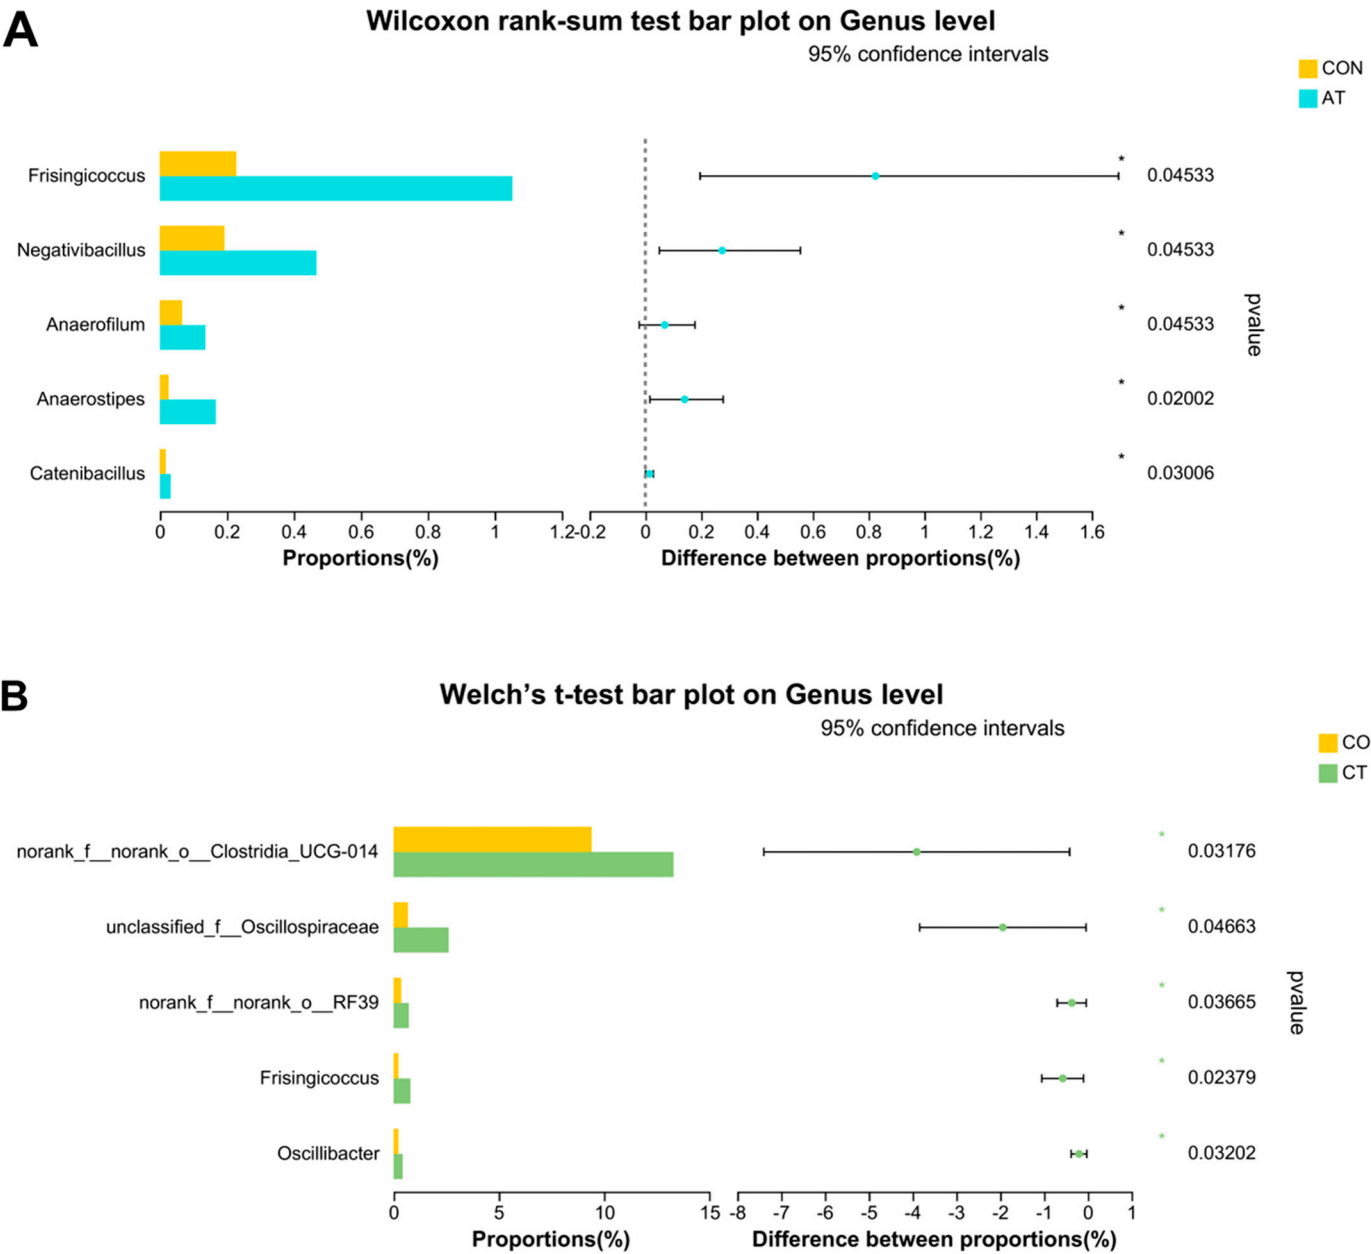

C

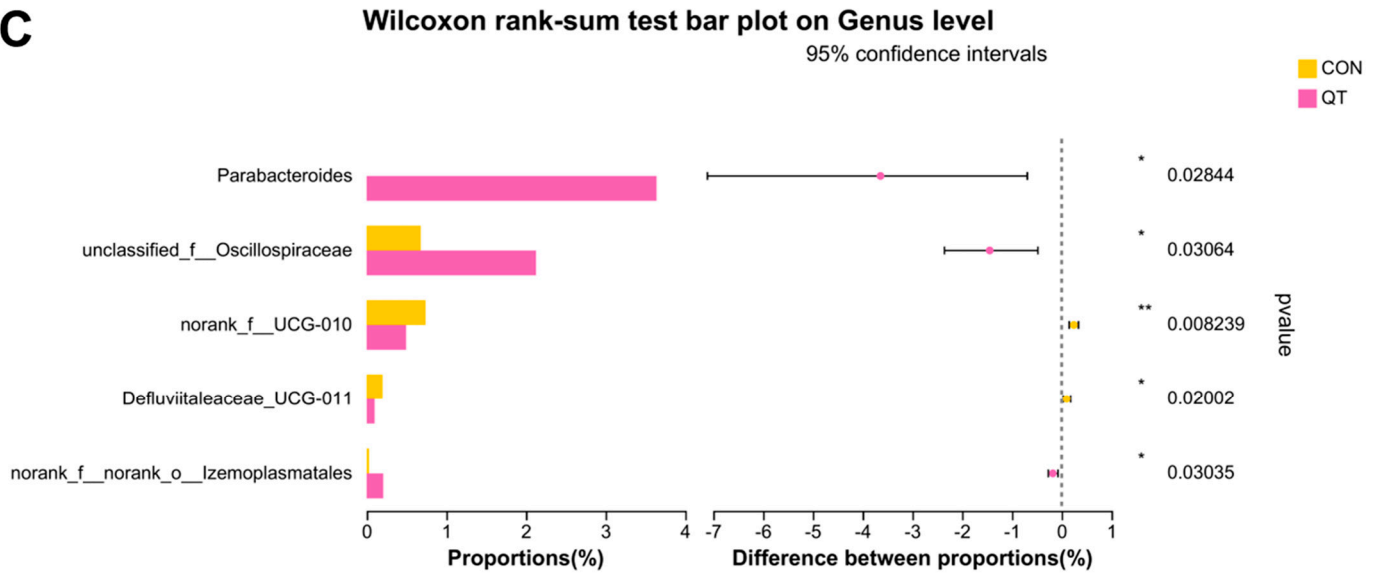

D

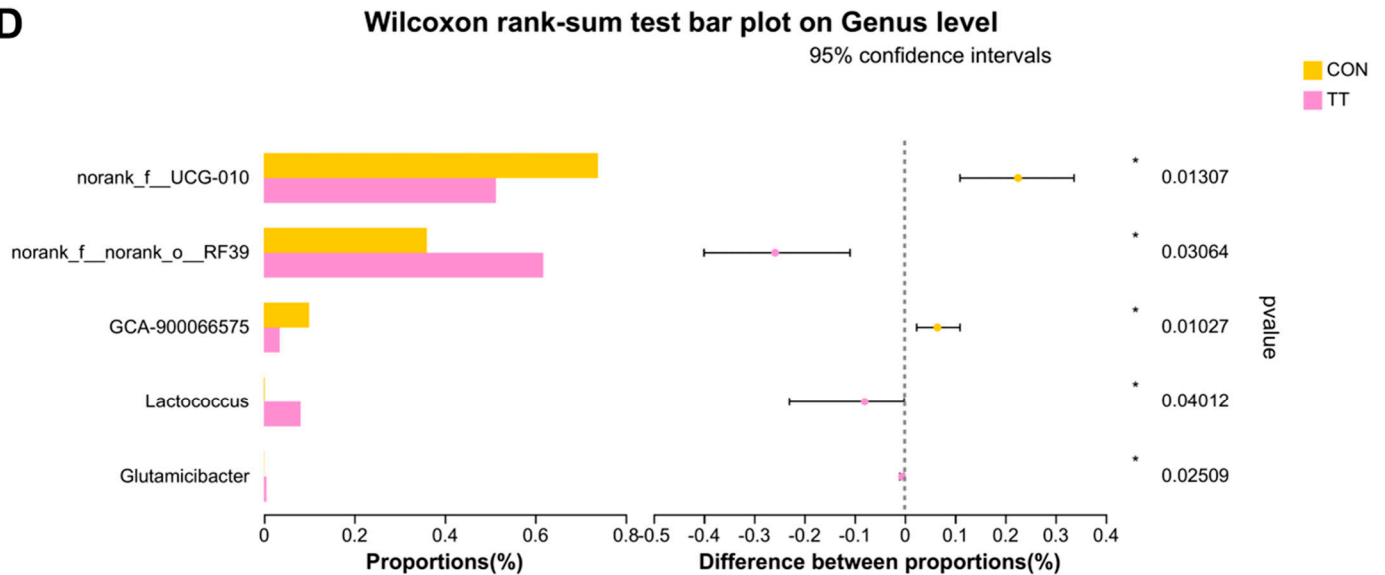

**Figure S3.** The relative abundance of genera with significant difference compared with control group in each tannin group. Statistical significance was determined by Wilcoxon rank-sum test for two groups comparisons. \*, compared with control group. \*,  $p < 0.05$ ; \*\*,  $p < 0.01$ . (n = 6/group). (A)CON-AT, (B)CON-CT, (C)CON-QT, (D)CON-TT. CON, control; AT, *Acacia mearnsii* tannin; CT, *Castanea sativa* tannin; QT, *Schinopsis lorenzii* tannin; TT, *Caesalpinia spinosa* tannin.
